# Supplementary material for: Drug-eluting beads bronchial arterial chemoembolization plus intercostals arterial infusion chemotherapy is effective and well-tolerated in treating non-small cell lung cancer patients with refractory malignant pleural effusion
Source: PubMed Central journal article supplement — J Thorac Dis. 2021 Apr;13(4):2339–50. doi: 10.21037/jtd-20-1603 (PMC8107566; doi:10.21037/jtd-20-1603), 2021-04
Supplement: jtd-13-04-2339-dss.pdf [file jtd-13-04-2339-dss.pdf]

## Data Sharing Statement

|                     |                                                                                                                                                    |                                                                                                                                 |
|---------------------|----------------------------------------------------------------------------------------------------------------------------------------------------|---------------------------------------------------------------------------------------------------------------------------------|
| <b>Article Info</b> | http://dx.doi.org/10.21037/jtd-20-1603.                                                                                                            |                                                                                                                                 |
| <b>Item</b>         | <b>Question</b>                                                                                                                                    | <b>Authors' Response<br/>(place "-" if not applicable)</b>                                                                      |
| 1                   | Would you like to share data collected for your study to others?                                                                                   | Yes.                                                                                                                            |
| 2                   | If not, would you like to share the reason for your decision?                                                                                      | -                                                                                                                               |
| 3                   | What data in particular will be shared?                                                                                                            | The efficacy of DEB-BACE plus intercostals arterial infusion chemotherapy in particular will be shared                          |
| 4                   | Any other documents will be share? Such as study protocol, statistical analysis plan, informed consent form, clinical study report, analytic code. | Statistical analysis plan, informed consent form, and clinical study report will also be shared if requested.                   |
| 5                   | When will data availability begin?                                                                                                                 | From the publication date.                                                                                                      |
| 6                   | When will data availability end?                                                                                                                   | Two years within the publication date, since the technique or survival date may be updated over time.                           |
| 7                   | To whom will you share the data?                                                                                                                   | Medical oncologists and lung surgeons who are interested in interventional therapy                                              |
| 8                   | For what type of analysis or purpose?                                                                                                              | For analysis to evaluate the efficacy and safety of DEB-BACE plus intercostals arterial infusion chemotherapy in NSCLC patients |
| 9                   | How or where can the data/documents be obtained?                                                                                                   | E-mails could be sent to the address below to obtain the share data:<br>baikangshao9706@163.com;<br>weikesi998@126.com          |
| 10                  | Any other restrictions?                                                                                                                            | We may balance the potential benefits and risks for each request and then provide the data that could be shared.                |
